# Supplementary material for: Microbial Population Changes in Decaying Ascophyllum nodosum Result in Macroalgal-Polysaccharide-Degrading Bacteria with Potential Applicability in Enzyme-Assisted Extraction Technologies
Source: PubMed Central journal article supplement (PMC6520818; doi:10.3390/md17040200), 2019-03-29

**Microbial population changes in decaying *Ascophyllum nodosum* result in macroalgal-polysaccharide-degrading bacteria with potential applicability in enzyme-assisted extraction technologies.**

Maureen W. Ihua<sup>1</sup>, Freddy Guihéneuf<sup>2</sup>, Halimah Mohammed<sup>1</sup>, Lekha M. Margassery<sup>1</sup>, Stephen A. Jackson<sup>1</sup>, Dagmar B. Stengel<sup>3</sup>, David J. Clarke<sup>1,4</sup>, Alan D.W. Dobson<sup>1,5\*</sup>

<sup>1</sup>School of Microbiology, University College Cork, Cork, Ireland; [w.ihua@umail.ucc.ie](mailto:w.ihua@umail.ucc.ie) (M.I.); [halimahmoh8@gmail.com](mailto:halimahmoh8@gmail.com) (H.M.); [lekha513@gmail.com](mailto:lekha513@gmail.com) (L.M.); [sjackson@ucc.ie](mailto:sjackson@ucc.ie) (S.J.); [a.dobson@ucc.ie](mailto:a.dobson@ucc.ie) (A.D.)

<sup>2</sup>Laboratoire d'Océanographie de Villefranche-sur-Mer (LOV) France; [freddy.guiheneuf@obs-vlfr.fr](mailto:freddy.guiheneuf@obs-vlfr.fr) (F.G.)

<sup>3</sup>Botany and Plant Science, School of Natural Sciences, Ryan Institute for Environmental, Marine and Energy Research, National University of Ireland Galway, Galway, Ireland; [dagmar.stengel@nuigalway.ie](mailto:dagmar.stengel@nuigalway.ie) (D.S.)

<sup>4</sup>APC Microbiome Institute, University College Cork, Cork, Ireland; [david.clarke@ucc.ie](mailto:david.clarke@ucc.ie) (D.C.)

<sup>5</sup>Environmental Research Institute, University College Cork, Cork, Ireland; [a.dobson@ucc.ie](mailto:a.dobson@ucc.ie) (A.D.)

\*Correspondence: [a.dobson@ucc.ie](mailto:a.dobson@ucc.ie) (A.D.)

**Keywords:** *Ascophyllum nodosum*, algal cell wall degrading enzymes, enzyme-assisted extraction, iChip device

**Table S1**

*Ascophyllum nodosum* associated bacterial isolates, their closest BLAST relative and observed enzymatic activities. Bacterial strains were examined for their hydroxyethyl cellulose (HE-cellulase), lichenase and pectinase activities. Enzymatic activity is indicated by a (+) sign while a (-) sign indicates that no enzymatic activity was observed under the conditions tested

**Figure S1**

Relative abundances at genus level of bacteria associated with the cultivable surface microbiota of (a) intact *Ascophyllum nodosum* and decaying *Ascophyllum nodosum* at 2, 4 and 6 weeks of decay at (a) 18 °C; 2\_18, 4\_18, 6\_18 (b) 25 °C; 2\_25, 4\_25, 6\_25 (c) 30 °C; 2\_30, 4\_30, 6\_30 which were obtained by maceration culture isolation method and (e) obtained by ichip culture isolation method. 16S rRNA gene sequences were obtained from the bacterial isolates and taxonomic analyses were performed. The relative distribution of phyla in each group is represented as a percentage

**Figure S2**

Neighbor-joining phylogenetic tree representing bacterial phyla cultured from *Ascophyllum nodosum* sample before induced decay ( $T_0$ ). The evolutionary relationships of each phylum identified are shown with reference sequences from NCBI included. This phylogenetic analysis was performed using single representative 16S rDNA sequences from each group

identified by Fastgroup program. The number of similar sequences represented by each sequence is shown in brackets. This tree was drawn using MEGA program (version 7) and bootstrapping percentages (1000 replicates) above 50% are shown

### Figure S3

Neighbor-joining phylogenetic tree representing bacterial phyla cultured from *Ascophyllum nodosum* sample at week 2 of induced decay from 8 °C, 25 °C and 30 °C. The evolutionary relationships of each phylum identified are shown with reference sequences from NCBI included. This phylogenetic analysis was made using single representative 16S rDNA sequences from each group identified by Avalanche NextGen Workbench version 2.30. The number of similar sequences represented by each sequence is shown in brackets. This tree was drawn using MEGA program (version 7) and bootstrapping percentages (1000 replicates) above 50% are shown

### Figure S4

Neighbor-joining phylogenetic tree representing bacterial phyla cultured from *Ascophyllum nodosum* sample at at week 4 of induced decay from 18 °C, 25 °C and 30 °C. The evolutionary relationships of each phylum identified are shown with reference sequences from NCBI included. This phylogenetic analysis was made using single representative 16S rDNA sequences from each group identified by Avalanche NextGen Workbench version 2.30. The number of similar sequences represented by each sequence is shown in brackets. This tree was drawn using MEGA program (version 7) and bootstrapping percentages (1000 replicates) above 50% are shown.

### Figure S5

Neighbor-joining phylogenetic tree representing bacterial phyla cultured from *Ascophyllum nodosum* sample at the end of the decay period (week 6) from ● 18 °C, ■ 25 °C and ▲ 30 °C. The evolutionary relationships of each phyla identified are shown with reference sequences from NCBI included. This phylogenetic analysis was made using single representative 16S rDNA sequences from each group identified by Avalanche NextGen Workbench version 2.30. The number of similar sequences represented by each sequence is shown in brackets. This neighbor joining tree was drawn using MEGA program (version 7) and bootstrapping percentages (1000 replicates) above 50% are shown.

### Figure S6

Neighbour-joining phylogenetic tree representing bacterial phyla cultured from ● 18 °C, ■ 25 °C and ▲ 30 °C using the iChip device. The evolutionary relationships of each phylum identified are shown with reference sequences from NCBI included. This phylogenetic analysis was performed using single representative 16S rDNA sequences from each group identified by Fastgroup. The number of similar sequences represented by each sequence is shown in brackets. This neighbor joining tree was drawn using MEGA program (version 7) and bootstrapping percentages (1000 replicates) above 50% are shown.

**Table S1**

| SAMPLE ID | TOP BLAST HIT                                    | IDENTITY (%) | ALGAL CELL WALL POLYSACCHARIDE DEGRADING ACTIVITIES |           |           |
|-----------|--------------------------------------------------|--------------|-----------------------------------------------------|-----------|-----------|
|           |                                                  |              | HE-cellulase                                        | Lichenase | pectinase |
| AN218_A2  | <i>Bacillus safensis</i> strain Rb1S1            | 100          | -                                                   | +         | -         |
| AN218_H5  | <i>Bacillus</i> sp. M101(2010) strain M101       | 100          | +                                                   | +         | -         |
| AN225_A5  | <i>Bacillus altitudinis</i> strain CT10          | 99           | -                                                   | +         | -         |
| AN225_A11 | <i>Bacillus licheniformis</i> strain HQB814      | 99           | +                                                   | -         | +         |
| AN225_B8  | <i>Bacillus licheniformis</i> strain AG-06       | 100          | -                                                   | -         | +         |
| AN225_B9  | <i>Bacillus licheniformis</i> strain ST7         | 99           | -                                                   | -         | +         |
| AN225_C1  | <i>Bacillus pumilus</i> strain ASpB9             | 99           | -                                                   | +         | -         |
| AN225_C7  | <i>Bacillus aerius</i> strain APBSMLB109         | 99           | -                                                   | +         | -         |
| AN225_C11 | <i>Bacillus</i> sp. 11RB3                        | 99           | -                                                   | +         | +         |
| AN225_D1  | <i>Bacillus licheniformis</i> strain APBSWPTB167 | 100          | +                                                   | -         | +         |
| AN225_D4  | <i>Bacillus subtilis</i> strain HDXJ04           | 99           | +                                                   | +         | +         |
| AN225_D6  | <i>Bacillus pumilus</i> strain ASpB9             | 100          | -                                                   | +         | -         |
| AN225_E1  | <i>Bacillus pumilus</i> strain ASpB9             | 100          | -                                                   | +         | -         |
| AN225_E6  | <i>Bacillus licheniformis</i> strain JMB003      | 99           | -                                                   | -         | +         |
| AN225_E7  | <i>Bacillus licheniformis</i> strain V24         | 100          | -                                                   | -         | +         |
| AN225_E8  | <i>Bacillus licheniformis</i> strain V24         | 100          | -                                                   | -         | +         |
| AN225_E9  | <i>Bacillus</i> sp. strain SKS7                  | 99           | -                                                   | -         | +         |
| AN225_E10 | <i>Bacillus licheniformis</i> strain KB102       | 99           | -                                                   | -         | +         |
| AN225_E11 | <i>Bacillus pumilus</i> strain ASpB9             | 100          | -                                                   | +         | -         |
| AN225_F6  | <i>Bacillus</i> sp. strain 703                   | 100          | -                                                   | -         | +         |
| AN225_F9  | <i>Bacillus</i> sp. strain C60                   | 99           | -                                                   | +         |           |
| AN225_F12 | <i>Bacillus licheniformis</i> strain V24         | 100          | +                                                   | -         | +         |

|           |                                                |     |   |   |   |
|-----------|------------------------------------------------|-----|---|---|---|
| AN225_G2  | <i>Bacillus</i> sp. strain SKS7                | 100 | + | - | + |
| AN225_G3  | <i>Bacillus</i> sp. (in: Bacteria) strain VI/7 | 100 | - | - | + |
| AN225_G6  | <i>Bacillus subtilis</i> strain AKKVG-2-18     | 100 | - | + | + |
| AN225_G8  | <i>Bacillus</i> sp. (in: Bacteria) strain VI/7 | 100 | - | - | + |
| AN230_A10 | <i>Bacillus pumilus</i> strain ASpB9           | 100 | - | + | - |
| AN230_B4  | <i>Bacillus</i> sp. strain SKS7                | 100 | + | - | + |
| AN230_B11 | <i>Bacillus mycoides</i> strain LBUM203        | 99  | + | - | + |
| AN230_D9  | <i>Bacillus licheniformis</i> strain V24       | 100 | + | - | + |
| AN230_D11 | <i>Bacillus licheniformis</i> strain V24       | 100 | + | - | + |
| AN230_E3  | <i>Bacillus</i> sp. (in: Bacteria) strain V52  | 100 | - | - | + |
| AN230_E4  | <i>Bacillus</i> sp. Ph_25A                     | 100 | - | + | - |
| AN425_D9  | <i>Bacillus</i> sp. strain CZL003              | 100 | + | + | + |
| AN425_D11 | <i>Bacillus licheniformis</i> strain 8B-B92    | 99  | + | - | + |
| AN425_D12 | <i>Bacillus</i> sp. strain SKS7                | 100 | + | - | + |
| AN425_E4  | <i>Bacillus</i> sp. strain BS155               | 100 | + | + | + |
| AN425_G7  | <i>Bacillus</i> sp. strain BS155               | 100 | + | - | + |
| AN618_A1  | <i>Bacillus pumilus</i> strain ASpB9           | 100 | - | + | - |
| AN618_A2  | <i>Bacillus pumilus</i> strain ASpB9           | 100 | - | + | - |
| AN618_B10 | <i>Bacillus pumilus</i> strain ASpB9           | 100 | - | + | - |
| AN618_D11 | <i>Bacillus pumilus</i> strain ASpB9           | 100 | + | + | - |
| AN618_H4  | <i>Bacillus pumilus</i> strain ASpB9           | 100 | - | + | - |
| AN625_A10 | <i>Bacillus pumilus</i> strain ASpB9           | 100 | - | + | - |
| AN625_D7  | <i>Bacillus pumilus</i> isolate TD22           | 100 | - | + | - |
| AN625_G10 | <i>Bacillus pumilus</i> strain ASpB9           | 100 | - | + | - |
| AN630_A12 | <i>Bacillus hwajinpoensis</i> strain 16E11     | 99  | - | + | - |
| AN630_D1  | <i>Bacillus pumilus</i> strain ASpB9           | 100 | - | + | - |
| AN630_D2  | <i>Bacillus pumilus</i> strain ASpB9           | 100 | - | + | - |
| AN630_G12 | <i>Bacillus pumilus</i> strain ASpB9           | 100 | - | + | - |
| AN630_H8  | <i>Bacillus safensis</i> strain Rb1S1          | 100 | - | + | - |
| IC18_D5   | <i>Vibrio oceanisediminis</i> strain S37       | 98  | - | - | + |
| IC18_D6   | <i>Vibrio anguillarum</i> strain INTA11        | 100 | - | - | + |
| IC18_D7   | <i>Vibrio anguillarum</i> strain X0906         | 99  | - | - | + |

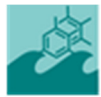

|          |                                          |     |   |   |   |
|----------|------------------------------------------|-----|---|---|---|
| IC18_D8  | <i>Vibrio oceanisediminis</i> strain S37 | 99  | - | - | + |
| IC18_D9  | <i>Vibrio anguillarum</i> strain X0906   | 99  | - | - | + |
| IC18_E2  | <i>Vibrio oceanisediminis</i> strain S37 | 98  | - | - | + |
| IC18_E6  | <i>Vibrio anguillarum</i> strain KAP1    | 100 | - | - | + |
| IC18_E7  | <i>Vibrio oceanisediminis</i> strain S37 | 99  | - | - | + |
| IC18_E8  | <i>Vibrio anguillarum</i> strain INTA11  | 100 | - | - | + |
| IC25_C11 | <i>Micrococcus yunnanensis</i>           | 100 | - | - | + |
| IC25_F10 | <i>Micrococcus yunnanensis</i>           | 100 | - | - | + |

Figure S1

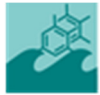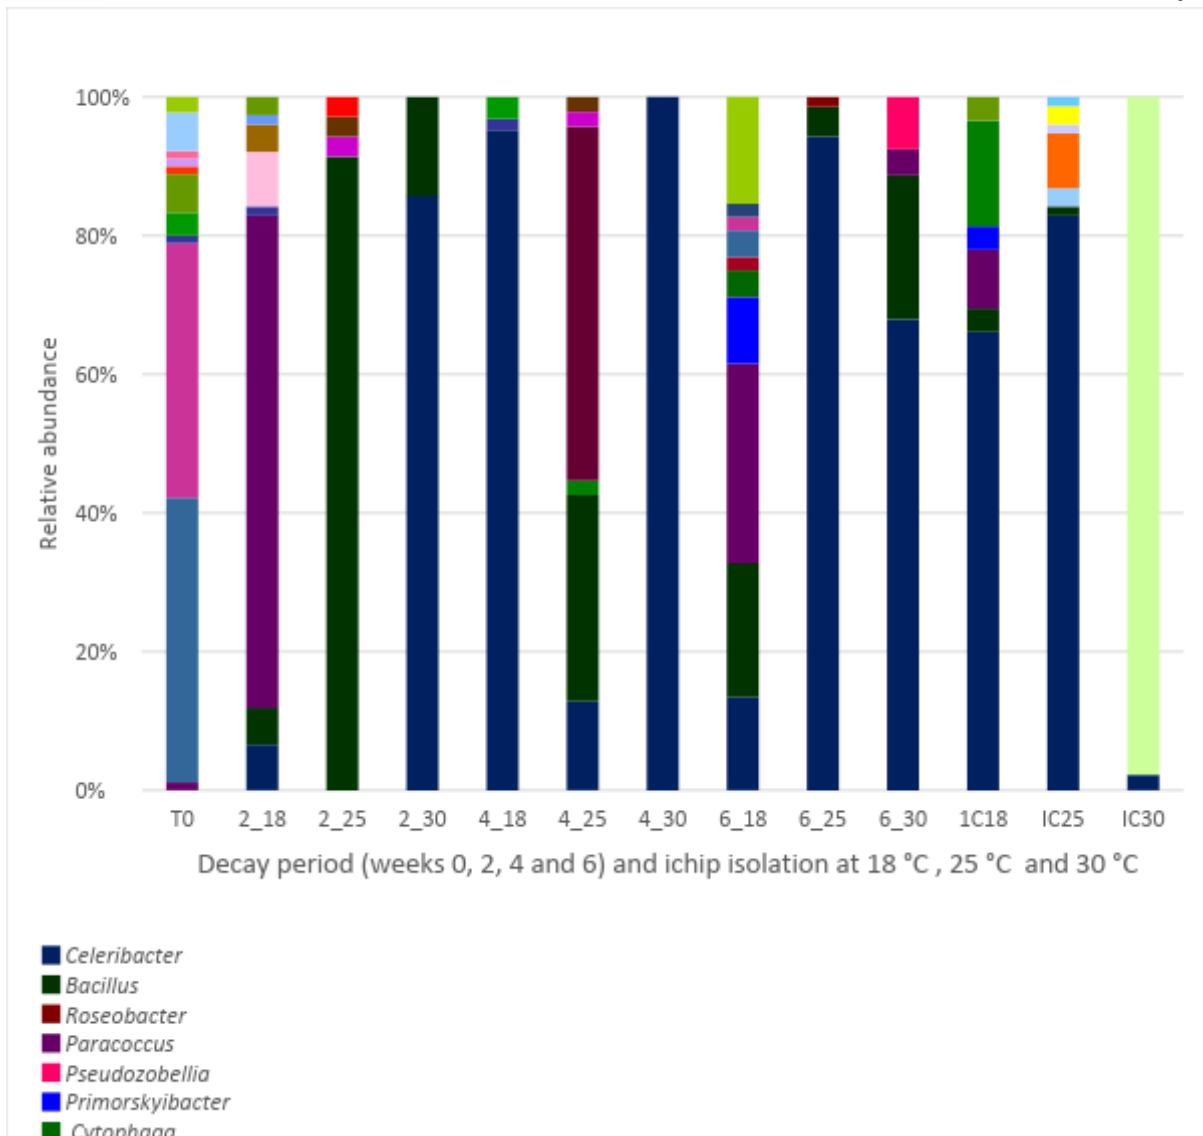



Figure S2

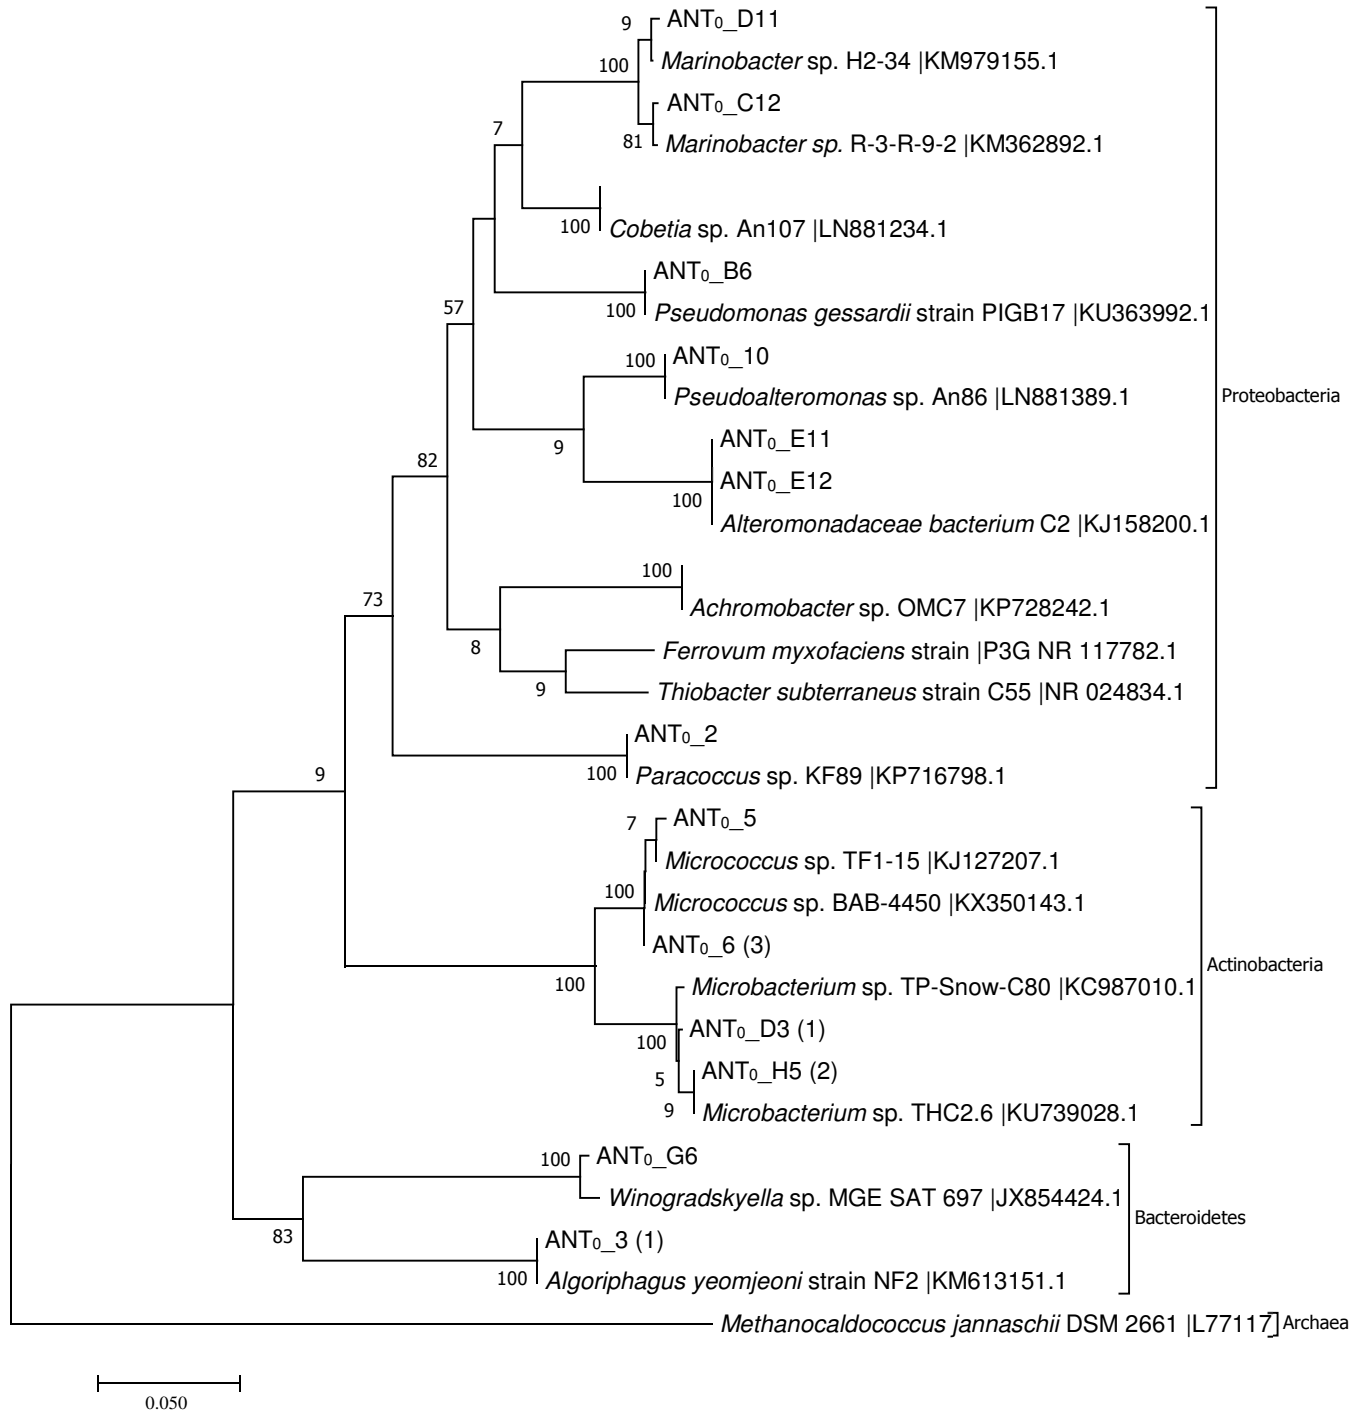

Figure S3

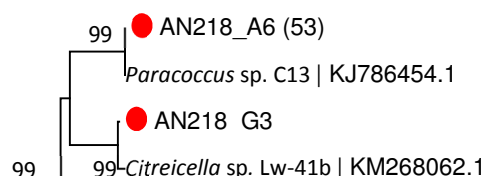

**Figure S4**

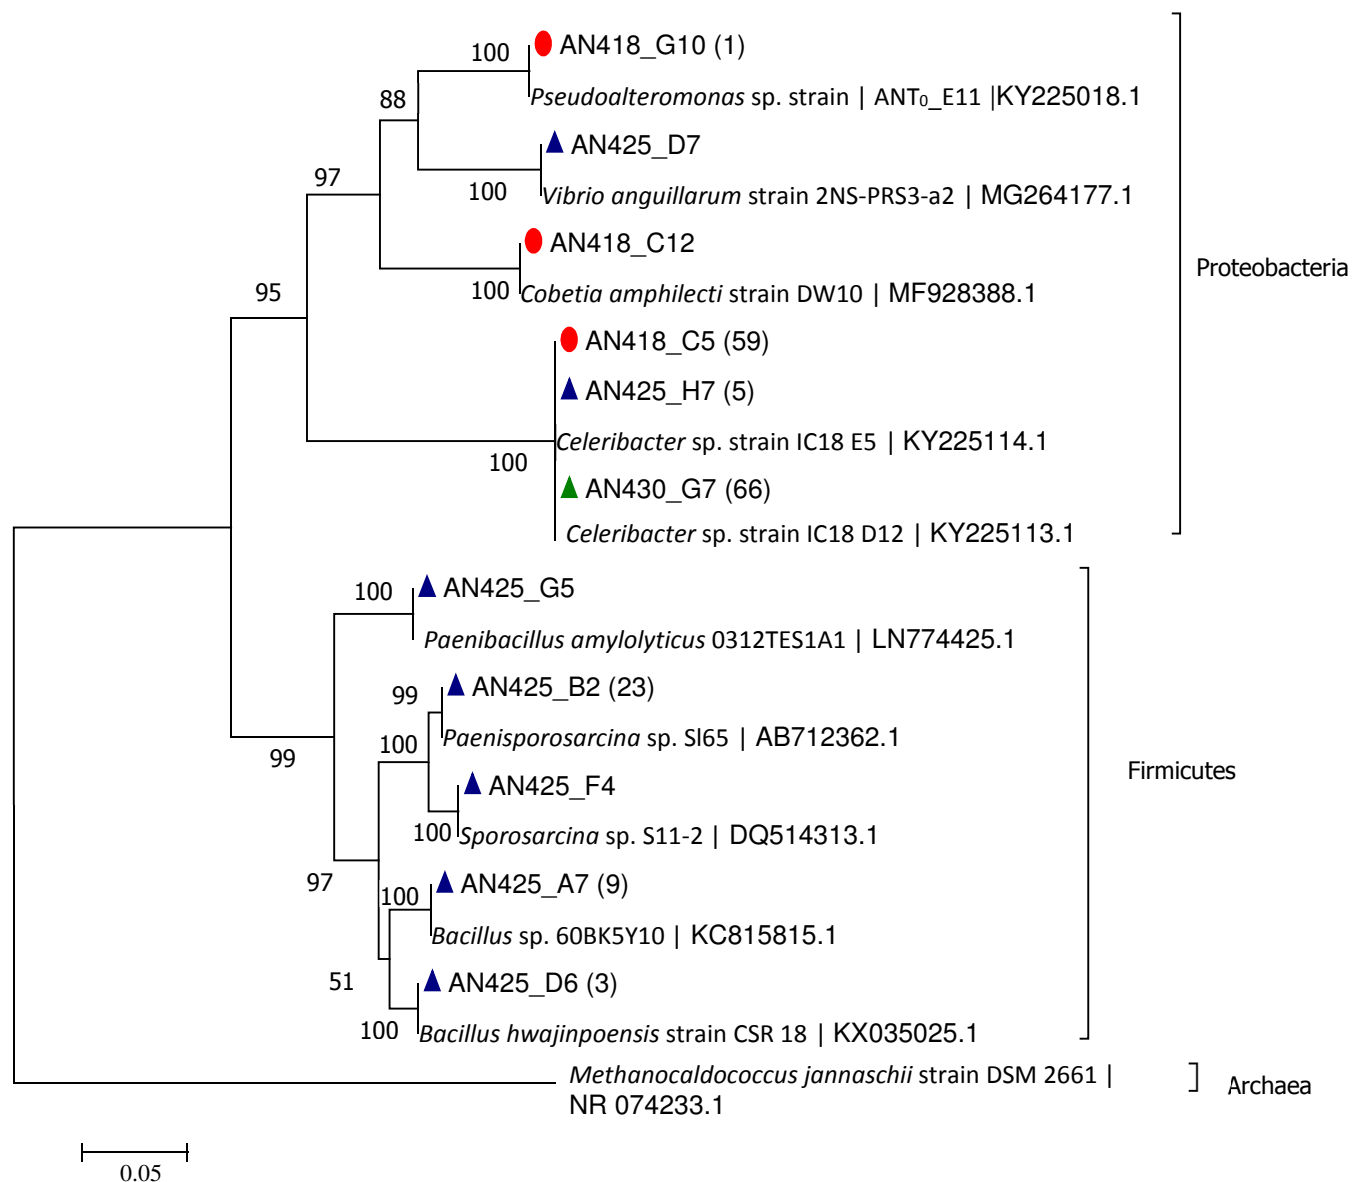

Figure S5

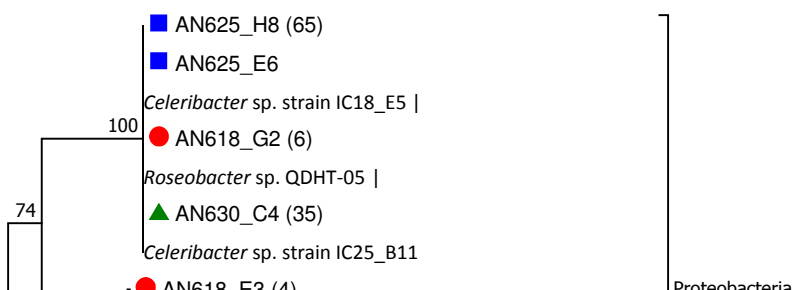

**Figure S6**

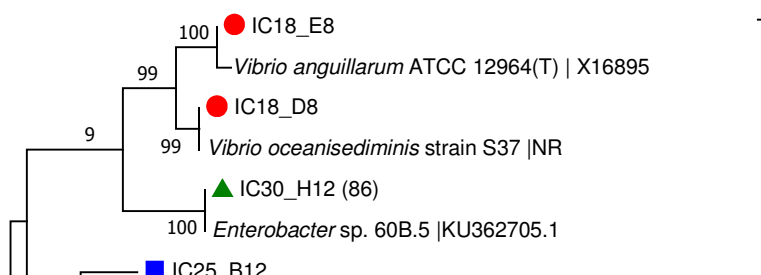

Supplement: marinedrugs-17-00200-s001.pdf [file marinedrugs-17-00200-s001.pdf]
